# Supplementary material for: The Evolutionary History of Nebraska Deer Mice: Local Adaptation in the Face of Strong Gene Flow
Source: PubMed Central journal article supplement — Mol Biol Evol. 2018 Jan 15;35(4):792–806. doi: 10.1093/molbev/msy004 (PMC5905656; doi:10.1093/molbev/msy004), 2018-01-15
Supplement: msy004_supp.pdf [file msy004_supp.pdf]

**Supplementary Table 1. Sampling locations and sample sizes for mice and soil samples.**

| Site name | Location                                                                           | Latitude    | Longitude    | Habitat | N (pheno) | N (soil) | N (geno) |
|-----------|------------------------------------------------------------------------------------|-------------|--------------|---------|-----------|----------|----------|
| Colome    | South Dakota: Tripp Co., cornfield near Colome, SD                                 | N43°13.485' | W99°40.353'  | Off     | 30        | 30       | 31       |
| Dogear    | South Dakota: Tripp Co., near Dog Ear Lake                                         | N43°09.766' | W99°54.581'  | Off     | 13        | 15       | 14       |
| Sharps    | Nebraska: Cherry Co., Sharp's Campground, Sparks, NE                               | N42°52.709' | W100°15.621' | Off     | 33        | 31       | 33       |
| Ballard   | Nebraska: Cherry Co., Ballards Marsh State Wildlife Management Area, Valentine, NE | N42°36.147' | W100°33.733' | SH      | 33        | 34       | 13       |
| Gudmund.  | Nebraska: Hooker Co., Gudmundsen Sand Hills laboratory, Whitman, NE                | N42°04.881' | W101°28.154' | SH      | 24        | 23       | 24       |
| SHGC      | Nebraska: Hooker Co., Sand Hills Golf Club; Mullen, NE                             | N41°51.605' | W101°05.117' | SH      | 15        | 18       | 15       |
| Arapaho   | Nebraska: Arthur Co., Arapaho Prairie, Arthur, NE                                  | N41°28.939' | W101°50.966' | SH      | 26        | 26       | 26       |
| Lemoyne   | Nebraska: Keith Co., Lemoyne, NE                                                   | N41°17.098' | W101°50.329' | SH      | 14        | 14       | 14       |
| Ogallala  | Nebraska: Keith Co., cornfield in Ogallala, NE                                     | N41°09.824' | W101°39.640' | Off     | 24        | 24       | 24       |
| Grant     | Nebraska: Perkins Co., cornfield in Grant, NE                                      | N40°54.612' | W101°43.631' | Off     | 30        | 30       | 30       |
| Imperial  | Nebraska: Chase Co., cornfield in Imperial, NE                                     | N40°32.270' | W101°37.240' | Off     | 24        | 25       | 25       |

The name and location of each of 11 sampling sites are provided. “Habitat” refers to whether the site is on or off of the Sand Hills (“SH” and “Off”, respectively). “N” indicates the final sample sizes for analysis of phenotypic (“pheno”), environmental (“soil”), and genetic (“geno”) variation. Note: juveniles were genotyped but not scored for phenotype.

**Supplementary Table 2. Strength of phenotypic association for previously identified candidate SNPs.**

| Candidate (2013) | Traits (2013)                 | Position in scaffold | Dorsal brightness | Dorsal hue   | Ventral brightness | D-V boundary | Tail stripe  |
|------------------|-------------------------------|----------------------|-------------------|--------------|--------------------|--------------|--------------|
| 31327            | Tail stripe                   | 25175452             | <b>0.082</b>      | 0.024        | 0.045              | <b>0.046</b> | <b>0.175</b> |
| 77047            | D-V boundary                  | 25128625             | 0.055             | 0.023        | 0.032              | 0.024        | 0.059        |
| 118834           | Dorsal hue                    | 25085120             | <b>0.203</b>      | <b>0.047</b> | <b>0.122</b>       | 0.026        | <b>0.123</b> |
| $\Delta_{ser}$   | Tail stripe;<br>ventral color | 25075943             | <b>0.543</b>      | <b>0.049</b> | <b>0.096</b>       | <b>0.497</b> | <b>0.137</b> |
| 147347           | Tail stripe                   | 25055240             | 0.051             | 0.035        | 0.037              | 0.026        | 0.058        |
| 147789           | D-V boundary                  | 25054805             | <b>0.069</b>      | 0.023        | 0.044              | 0.037        | 0.049        |
| Mean             |                               |                      | 0.055             | 0.026        | 0.038              | 0.033        | 0.058        |

Candidate (2013) and Traits (2013) refer to significant genotype-phenotype associations identified in Linnen *et al.* (2013); remaining columns pertain to this study. Values in cells correspond to the posterior inclusion probabilities (PIP) for each trait and each candidate SNP (location on scaffold 16 is in base pairs). Gray boxes indicate SNPs that exceed our PIP threshold (>0.1). Bolded numbers exceed background levels of association for that trait (mean + 0.01; mean PIP across all SNPs for each trait is given in the last row).

**Supplementary Table 3. Hyper-parameters describing the genetic architecture of five color traits.**

| Trait              | h                 | PVE               | rho               | PGE               | n_gamma          |
|--------------------|-------------------|-------------------|-------------------|-------------------|------------------|
| Dorsal brightness  | 0.66 (0.37, 0.92) | 0.79 (0.60, 0.95) | 0.76 (0.43, 0.98) | 0.87 (0.68, 0.99) | 132.10 (7, 291)  |
| Dorsal hue         | 0.32 (0.10, 0.59) | 0.31 (0.11, 0.54) | 0.42 (0.03, 0.92) | 0.41 (0, 0.93)    | 73.44 (0, 276)   |
| Ventral brightness | 0.40 (0.20, 0.63) | 0.45 (0.25, 0.66) | 0.57 (0.18, 0.93) | 0.62 (0.23, 0.95) | 92.43 (3, 277)   |
| D-V boundary       | 0.57 (0.30, 0.82) | 0.68 (0.48, 0.87) | 0.78 (0.47, 0.98) | 0.87 (0.68, 0.99) | 62.37 (6, 214)   |
| Tail stripe        | 0.80 (0.53, 1.00) | 0.88 (0.71, 1.00) | 0.82 (0.60, 0.98) | 0.88 (0.73, 0.99) | 196.64 (60, 296) |

All parameters were estimated using a BSLMM model in GEMMA, 8,616 SNPs, and a relatedness matrix estimated from genome-wide SNPs. Parameter means and 95% credible intervals (lower bound, upper bound) were calculated from ten independent runs per trait. Interpretation of hyper-parameters is as follows: *PVE*, the total proportion of phenotypic variance that is explained by genotype; *PGE*, the proportion of genetic variance explained by sparse (*i.e.*, major) effects; *h*, an approximation used for prior specification of the expected value of *PVE*; *rho*, an approximation used for prior specification of the expected value of *PGE*; *n\_gamma*, the expected number of sparse (major) effect SNPs.

**Supplementary Table 4. Posterior inclusion probabilities for candidate SNPs identified in association mapping analysis of all SNPs.**

| SNP Position           | Dorsal brightness | Dorsal hue | Ventral brightness | D-V boundary | Tail stripe | Maximum |
|------------------------|-------------------|------------|--------------------|--------------|-------------|---------|
| scaffold00016:25175228 | 0.0470            | 0.0086     | 0.0279             | 0.7796       | 0.0412      | 0.7796  |
| scaffold00016:25075943 | 0.4683            | 0.0196     | 0.0479             | 0.2306       | 0.0818      | 0.4683  |
| NW_006502179.1:31437   | 0.0735            | 0.0073     | 0.0203             | 0.0036       | 0.3777      | 0.3777  |
| scaffold00016:25075903 | 0.0237            | 0.0080     | 0.0107             | 0.0350       | 0.3404      | 0.3404  |
| NW_006501090.1:4441929 | 0.0287            | 0.0077     | 0.0103             | 0.3168       | 0.0177      | 0.3168  |
| NW_006501041.1:4744196 | 0.0160            | 0.0084     | 0.0091             | 0.2539       | 0.0248      | 0.2539  |
| NW_006501185.1:901540  | 0.2517            | 0.0089     | 0.0121             | 0.0048       | 0.0214      | 0.2517  |
| scaffold00016:25076212 | 0.0428            | 0.0076     | 0.0227             | 0.0156       | 0.2495      | 0.2495  |
| NW_006501416.1:2319587 | 0.0435            | 0.0068     | 0.0249             | 0.0034       | 0.2466      | 0.2466  |
| scaffold00016:25085405 | 0.0111            | 0.0145     | 0.0109             | 0.0295       | 0.2251      | 0.2251  |
| NW_006501625.1:1977638 | 0.2184            | 0.0062     | 0.0072             | 0.0226       | 0.0137      | 0.2184  |
| NW_006501710.1:808272  | 0.0122            | 0.0102     | 0.0124             | 0.0178       | 0.2157      | 0.2157  |
| NW_006501970.1:52602   | 0.0122            | 0.0085     | 0.0104             | 0.2151       | 0.0535      | 0.2151  |
| scaffold00016:25074418 | 0.0153            | 0.0077     | 0.0091             | 0.0067       | 0.2151      | 0.2151  |
| scaffold00016:25173672 | 0.0735            | 0.0081     | 0.0925             | 0.0316       | 0.2147      | 0.2147  |
| NW_006501363.1:1300597 | 0.0149            | 0.0094     | 0.0088             | 0.0038       | 0.2106      | 0.2106  |
| NW_006501215.1:2183663 | 0.0109            | 0.0075     | 0.0118             | 0.0045       | 0.2096      | 0.2096  |
| NW_006501164.1:562237  | 0.0149            | 0.0077     | 0.0084             | 0.0040       | 0.2042      | 0.2042  |
| NW_006501505.1:1234861 | 0.0144            | 0.0082     | 0.0222             | 0.0036       | 0.2035      | 0.2035  |
| NW_006501064.1:4448524 | 0.0104            | 0.1988     | 0.0079             | 0.0039       | 0.0279      | 0.1988  |
| scaffold00016:25076355 | 0.0711            | 0.0072     | 0.0129             | 0.0121       | 0.1936      | 0.1936  |
| NW_006501066.1:6401068 | 0.0096            | 0.0070     | 0.0080             | 0.0044       | 0.1926      | 0.1926  |
| NW_006501363.1:1424874 | 0.0126            | 0.0099     | 0.0089             | 0.1915       | 0.0212      | 0.1915  |
| scaffold00016:25108248 | 0.1841            | 0.0073     | 0.0332             | 0.0077       | 0.0318      | 0.1841  |
| NW_006501066.1:6400593 | 0.0112            | 0.0092     | 0.0092             | 0.1833       | 0.0195      | 0.1833  |
| NW_006501258.1:1259668 | 0.0531            | 0.0076     | 0.0156             | 0.0633       | 0.1811      | 0.1811  |
| scaffold00016:25078686 | 0.1800            | 0.0070     | 0.0753             | 0.0152       | 0.0334      | 0.1800  |
| scaffold00016:25175452 | 0.0577            | 0.0073     | 0.0178             | 0.0167       | 0.1751      | 0.1751  |
| scaffold00016:25111157 | 0.1734            | 0.0079     | 0.0379             | 0.0133       | 0.0366      | 0.1734  |
| scaffold00016:25175879 | 0.0137            | 0.0097     | 0.0112             | 0.1706       | 0.0166      | 0.1706  |
| NW_006501149.1:6204758 | 0.0198            | 0.0083     | 0.0138             | 0.0088       | 0.1694      | 0.1694  |
| scaffold00016:25195324 | 0.0113            | 0.0084     | 0.0122             | 0.1643       | 0.0750      | 0.1643  |
| scaffold00016:25117322 | 0.0351            | 0.0072     | 0.0170             | 0.0041       | 0.1628      | 0.1628  |
| scaffold00016:25033802 | 0.0143            | 0.0090     | 0.0196             | 0.0050       | 0.1598      | 0.1598  |
| scaffold00016:25085108 | 0.1598            | 0.0210     | 0.0926             | 0.0050       | 0.0740      | 0.1598  |
| scaffold00016:25058748 | 0.0115            | 0.0119     | 0.0114             | 0.0089       | 0.1587      | 0.1587  |
| NW_006501112.1:2369721 | 0.0428            | 0.0071     | 0.1560             | 0.0034       | 0.0215      | 0.1560  |



|                        |        |        |        |        |        |        |
|------------------------|--------|--------|--------|--------|--------|--------|
| scaffold00016:25103837 | 0.0402 | 0.0141 | 0.0142 | 0.0092 | 0.1547 | 0.1547 |
| scaffold00016:25103836 | 0.0413 | 0.0143 | 0.0145 | 0.0094 | 0.1543 | 0.1543 |
| scaffold00016:25066132 | 0.0134 | 0.0077 | 0.0124 | 0.1537 | 0.0149 | 0.1537 |
| scaffold00016:25108191 | 0.1531 | 0.0078 | 0.0345 | 0.0074 | 0.0306 | 0.1531 |
| scaffold00016:25085120 | 0.1502 | 0.0226 | 0.0793 | 0.0055 | 0.0678 | 0.1502 |
| scaffold00016:25063343 | 0.0206 | 0.0080 | 0.0088 | 0.1491 | 0.0166 | 0.1491 |
| NW_006501047.1:4679252 | 0.0257 | 0.0092 | 0.0079 | 0.1488 | 0.0225 | 0.1488 |
| scaffold00016:25113309 | 0.1483 | 0.0109 | 0.0089 | 0.0058 | 0.0160 | 0.1483 |
| NW_006501634.1:1603622 | 0.0192 | 0.0076 | 0.0112 | 0.0042 | 0.1478 | 0.1478 |
| scaffold00016:25074446 | 0.0128 | 0.0167 | 0.0082 | 0.0062 | 0.1415 | 0.1415 |
| NW_006501392.1:259982  | 0.0163 | 0.0078 | 0.0080 | 0.0041 | 0.1403 | 0.1403 |
| scaffold00016:25076229 | 0.0242 | 0.0085 | 0.0160 | 0.0157 | 0.1320 | 0.1320 |
| scaffold00016:25039123 | 0.0120 | 0.0086 | 0.0103 | 0.1317 | 0.0182 | 0.1317 |
| NW_006501505.1:1621286 | 0.1308 | 0.0067 | 0.0116 | 0.0090 | 0.0157 | 0.1308 |
| NW_006501476.1:2057524 | 0.0274 | 0.0095 | 0.0098 | 0.0051 | 0.1298 | 0.1298 |
| NW_006501197.1:6731032 | 0.0129 | 0.0081 | 0.0092 | 0.0056 | 0.1281 | 0.1281 |
| NW_006501271.1:2908119 | 0.0296 | 0.0083 | 0.0095 | 0.0148 | 0.1253 | 0.1253 |
| NW_006501154.1:2893063 | 0.0111 | 0.0075 | 0.0074 | 0.0036 | 0.1249 | 0.1249 |
| scaffold00016:25066476 | 0.0108 | 0.0079 | 0.0068 | 0.1240 | 0.0151 | 0.1240 |
| NW_006501355.1:2485903 | 0.1238 | 0.0125 | 0.0161 | 0.0046 | 0.0198 | 0.1238 |
| NW_006501156.1:4189217 | 0.0103 | 0.0147 | 0.0076 | 0.0043 | 0.1227 | 0.1227 |
| scaffold00016:25098160 | 0.0145 | 0.0080 | 0.0117 | 0.1215 | 0.0349 | 0.1215 |
| scaffold00016:25063986 | 0.0182 | 0.0080 | 0.0104 | 0.1214 | 0.0383 | 0.1214 |
| NW_006502017.1:177456  | 0.1211 | 0.0106 | 0.0098 | 0.0037 | 0.0196 | 0.1211 |
| NW_006501451.1:1085407 | 0.0134 | 0.0082 | 0.0103 | 0.0124 | 0.1205 | 0.1205 |
| scaffold00016:25084934 | 0.1204 | 0.0118 | 0.0357 | 0.0087 | 0.0465 | 0.1204 |
| NW_006504112.1:718     | 0.0130 | 0.0083 | 0.0077 | 0.0040 | 0.1197 | 0.1197 |
| NW_006501124.1:2767575 | 0.0094 | 0.0082 | 0.0097 | 0.0043 | 0.1186 | 0.1186 |
| NW_006501363.1:1301032 | 0.0196 | 0.0079 | 0.0099 | 0.1168 | 0.0190 | 0.1168 |
| scaffold00016:25085230 | 0.0102 | 0.0069 | 0.0089 | 0.0038 | 0.1160 | 0.1160 |
| scaffold00016:25173030 | 0.0315 | 0.0086 | 0.0131 | 0.0109 | 0.1158 | 0.1158 |
| NW_006501178.1:430728  | 0.0144 | 0.0074 | 0.1152 | 0.0045 | 0.0171 | 0.1152 |
| NW_006501342.1:346813  | 0.0334 | 0.0079 | 0.0205 | 0.0153 | 0.1152 | 0.1152 |
| NW_006502126.1:565845  | 0.0105 | 0.0071 | 0.0075 | 0.0063 | 0.1150 | 0.1150 |
| NW_006501818.1:1377012 | 0.1143 | 0.0074 | 0.0142 | 0.0043 | 0.0213 | 0.1143 |
| NW_006501064.1:4448280 | 0.1132 | 0.0070 | 0.0071 | 0.0037 | 0.0262 | 0.1132 |
| scaffold00016:25086542 | 0.0306 | 0.0072 | 0.0321 | 0.0074 | 0.1127 | 0.1127 |
| scaffold00016:25075977 | 0.1126 | 0.0117 | 0.0368 | 0.0288 | 0.0160 | 0.1126 |
| NW_006501049.1:2210807 | 0.0131 | 0.0108 | 0.0076 | 0.0047 | 0.1122 | 0.1122 |
| NW_006502572.1:27506   | 0.0134 | 0.0094 | 0.0082 | 0.0561 | 0.1114 | 0.1114 |
| scaffold00016:25126621 | 0.0149 | 0.0232 | 0.0084 | 0.0047 | 0.1109 | 0.1109 |
| scaffold00016:25157370 | 0.0174 | 0.0083 | 0.0100 | 0.0057 | 0.1087 | 0.1087 |
| NW_006501094.1:2379444 | 0.0116 | 0.0080 | 0.0227 | 0.1080 | 0.0184 | 0.1080 |

|                        |        |        |        |        |        |        |
|------------------------|--------|--------|--------|--------|--------|--------|
| NW_006501818.1:1376978 | 0.1078 | 0.0076 | 0.0167 | 0.0048 | 0.0190 | 0.1078 |
| scaffold00016:25175932 | 0.0605 | 0.0086 | 0.0349 | 0.1065 | 0.0921 | 0.1065 |
| NW_006501066.1:6860433 | 0.0388 | 0.0295 | 0.0134 | 0.0051 | 0.1063 | 0.1063 |
| NW_006501280.1:3657919 | 0.1059 | 0.0073 | 0.0085 | 0.0067 | 0.0162 | 0.1059 |
| scaffold00016:25195321 | 0.0125 | 0.0097 | 0.0106 | 0.1053 | 0.0944 | 0.1053 |
| NW_006501131.1:1733529 | 0.0123 | 0.0103 | 0.0091 | 0.0044 | 0.1043 | 0.1043 |
| NW_006501237.1:5407969 | 0.0137 | 0.0095 | 0.0092 | 0.0070 | 0.1035 | 0.1035 |
| scaffold00016:25107989 | 0.1035 | 0.0084 | 0.0492 | 0.0151 | 0.0521 | 0.1035 |
| scaffold00016:25155955 | 0.0099 | 0.0071 | 0.0096 | 0.0050 | 0.1025 | 0.1025 |
| NW_006501392.1:260035  | 0.1024 | 0.0085 | 0.0109 | 0.0051 | 0.0194 | 0.1024 |
| scaffold00016:25064166 | 0.0142 | 0.0080 | 0.0102 | 0.1023 | 0.0239 | 0.1023 |
| NW_006501363.1:1420928 | 0.0088 | 0.0070 | 0.0085 | 0.1018 | 0.0137 | 0.1018 |
| NW_006501387.1:1348066 | 0.1016 | 0.0080 | 0.0568 | 0.0059 | 0.0211 | 0.1016 |
| scaffold00016:25063484 | 0.0136 | 0.0078 | 0.0152 | 0.1011 | 0.0282 | 0.1011 |
| NW_006501267.1:5399680 | 0.0315 | 0.0080 | 0.0095 | 0.0062 | 0.1011 | 0.1011 |

Position of each SNP is given as scaffold:position (in base pairs) in scaffold. *Agouti* is located on scaffold 16. All other scaffolds are “non-*Agouti*”. SNP posterior inclusion probabilities (PIPs) were estimated using a BSLMM model in GEMMA, 8,616 SNPs, and a relatedness matrix estimated from genome-wide SNPs. SNPs were included as candidates in this table if they had a PIP>0.10 for at least one pigmentation trait.

**Supplementary Table 5. Likelihood values for each model, obtained with the full dataset including linked SNPs (3D-MSFS).**

| <b>Models</b>                          | <b>#p</b> | <b>Estimated<br/>Log10<br/>(Lhood)</b> | <b>Max possible<br/>Log10<br/>(Lhood)</b> | <b><math>\Delta</math>log10<br/>(Lhood)</b> | <b><math>\Delta</math>best model<br/>log10<br/>(Lhood)</b> |
|----------------------------------------|-----------|----------------------------------------|-------------------------------------------|---------------------------------------------|------------------------------------------------------------|
| Topology<br>Off North; (On, Off South) | 16        | - 287,775                              | - 287,025                                 | -749                                        | 0                                                          |
| Topology<br>(Off North, On); Off South | 16        | - 287,778                              | - 287,025                                 | -753                                        | -3                                                         |

Number of parameters (#p) is given. “Estimated Log10(Lhood)” is the estimated likelihood values for each model, in log10 scale. “Max possible Log10(Lhood)” is the likelihood if there were a perfect fit between the expected and observed site frequency spectrum. “ $\Delta$ log10(Lhood)” is the difference between the estimated and maximal possible log10 likelihood. “ $\Delta$ best model Log10(Lhood)” is the difference in log10 units between the likelihood of each model and the likelihood of the best model; the best model is the model with a  $\Delta$ best model of 0.

**Supplementary Table 6. Parameter estimates obtained for the different demographic models.**

| Parameters                                                                      | Point estimates                                  |                                                 | 95% Confidence intervals                    |          |
|---------------------------------------------------------------------------------|--------------------------------------------------|-------------------------------------------------|---------------------------------------------|----------|
|                                                                                 | Worst model<br>Topology<br>(Off N,<br>On), Off S | Best model<br>Topology<br>Off N;<br>(On, Off S) | Best model<br>Topology<br>Off N;(On, Off S) |          |
| <b><i>Effective sizes (diploid Ne)</i></b>                                      |                                                  |                                                 |                                             |          |
| N ancestral                                                                     | 19,911                                           | 17,262                                          | 5,679                                       | 25,386   |
| N Off North                                                                     | 38,343                                           | 39,847                                          | 27,890                                      | 58,658   |
| N On                                                                            | 33,871                                           | 43,708                                          | 30,098                                      | 51,162   |
| N Off South                                                                     | 60,166                                           | 54,568                                          | 39,936                                      | 68,150   |
| N ancNorth                                                                      | 87,790                                           | 66,502                                          | 38,645                                      | 86,798   |
| N ancSouth                                                                      | 55,416                                           | 56,768                                          | 30,953                                      | 84,090   |
| N BotOn (100 generations)                                                       | 32                                               | 17                                              | 6                                           | 209      |
| N BotAncestral (100 generations)                                                | 13                                               | 884                                             | 18                                          | 1,379    |
| <b><i>Time of events (years)</i></b>                                            |                                                  |                                                 |                                             |          |
| Time Split On                                                                   | 4,026                                            | 3,709                                           | 3,400                                       | 7,942    |
| Time Split ancestral                                                            | 39,410                                           | 45,471                                          | 37,073                                      | 57,782   |
| <b><i>Scaled migration rates (2Nm, number of immigrants per generation)</i></b> |                                                  |                                                 |                                             |          |
| On to Off N                                                                     | 13.93                                            | 12.46                                           | 2.6                                         | 18.2     |
| Off N to On                                                                     | 6.97                                             | 6.40                                            | 1.4                                         | 13.1     |
| Off S to On                                                                     | 17.82                                            | 18.28                                           | 12.5                                        | 24.0     |
| On to Off S                                                                     | 0.37                                             | 3.62                                            | 0.0                                         | 11.3     |
| Between Off S and Off N                                                         | 4.99                                             | 4.87                                            | 1.9                                         | 8.6      |
| Between Off N (or Off S) and ancestral On-Off S (or On-Off N)                   | 5.6e-4                                           | 3.61e-4                                         | 0.0                                         | 0.3      |
| <b><i>Migration rates (m, proportion of migrants per generation)</i></b>        |                                                  |                                                 |                                             |          |
| On to Off N                                                                     | 1.59e-04                                         | 1.56e-04                                        | 2.36e-05                                    | 3.27e-04 |
| Off N to On                                                                     | 9.03e-05                                         | 7.32e-05                                        | 1.79e-05                                    | 1.99e-04 |
| Off S to On                                                                     | 2.31e-04                                         | 2.09e-04                                        | 1.54e-04                                    | 3.35e-04 |
| On to Off S                                                                     | 2.67e-06                                         | 3.32e-05                                        | 3.24e-10                                    | 1.39e-04 |
| Between Off S and Off N                                                         | 5.72e-05                                         | 6.11e-05                                        | 3.42e-05                                    | 8.08e-05 |
| Between Off N (or Off S) and ancestral On-Off S (or On-Off N)                   | 2.84e-09                                         | 2.71e-09                                        | 6.64e-11                                    | 2.57e-06 |

Description of the parameter tags is given in Supplementary Figure 2. The parameter estimates are similar and consistent across models, pointing to a recent divergence time of the Sand Hills population and to high migration rates. These estimates suggest: (i) a bottleneck associated with the split of the Sand Hills population (N BotOn); (ii) recent split times for the on Sand Hills population (3.4-9.7 kya); (iii) a very old split of Off North (37.1-57.8kya); (iv) asymmetric and high migration rates ( $2Nm > 5$ ), with higher gene flow in the direction south to north, consistent with a southern colonization.

**Supplementary Table 7.  $F_{ST}$  values in the *Agouti* locus.**

| <b>Position</b> | <b><math>F_{ST}</math>: On vs Off North</b> | <b><math>F_{ST}</math>: On vs Off South</b> |
|-----------------|---------------------------------------------|---------------------------------------------|
| 25103904        | 0.442782                                    | 0.455174                                    |
| 25107989        | 0.475032                                    | 0.466737                                    |
| 25108113        | 0.452818                                    | 0.454937                                    |
| 25108191        | 0.451366                                    | 0.474141                                    |
| 25108248        | 0.451366                                    | 0.463734                                    |
| 25108273        | 0.422605                                    | 0.475471                                    |
| 25111157        | 0.457267                                    | 0.490538                                    |
| 25111390        | 0.402897                                    | 0.49633                                     |

Summary of  $F_{ST}$  values “On” the Sand Hills relative to “Off North” of the Sand Hills and separately to “Off South” of the Sand Hills. SNP positions given in basepairs on scaffold 16.

**Supplementary Table 8. Summary of the filtered datasets used for analysis.**

|                                                           | Population structure<br>(1 SNP per block) | Demographic<br>analyses | Association<br>mapping |
|-----------------------------------------------------------|-------------------------------------------|-------------------------|------------------------|
| Length blocks (kb)                                        | 1.5                                       | 1.5                     | 1                      |
| Min. #accessible sites per block                          | 150                                       | 150                     | NA                     |
| Min. median distance among SNPs within<br>a block (in bp) | 3                                         | 3                       | NA                     |
| Min. depth of coverage DP                                 | 4                                         | 4                       | 2                      |
| Min. individual mean DP                                   | 8                                         | 8                       | 2                      |
| Max. DP                                                   | $2*mDP$                                   | $2*mDP$                 | $2*mDP$                |
| Max. missing data per site allowed                        | 0.1                                       | 0                       | 0.1                    |
| Max. missing data per individual allowed                  | 0.25                                      | 0                       | 0.25                   |
| Minor allele frequency filter                             | $1/(2*n)$                                 | 0                       | 0.01                   |
| Number of individuals                                     | 161                                       | 30                      | 236                    |
| Number of SNPs                                            | 5412                                      | 140358                  | 12920                  |
| Number of accessible sites                                | NA                                        | 2674174                 | NA                     |

$mDP$  corresponds to the mean depth of coverage (DP) per individual, and  $n$  corresponds to the number of individuals. Three columns provide details for each analyses presented – the dataset used to assess population structure, demographic analyses, and association mapping.

**Supplementary Table 9. Summary of the dataset based on the random background genomic regions.**

|                 | #Blocks | #SNPs  | #Accessible sites | Median<br>#SNPs/block | Median<br>#CallableSites/block |
|-----------------|---------|--------|-------------------|-----------------------|--------------------------------|
| All blocks      | 52566   | 649300 | 6224355           | 4                     | 100                            |
| Filtered blocks | 11770   | 284287 | 2814532           | 19                    | 207                            |

These data are used for the population structure and demographic analyses, dividing the scaffolds into contiguous blocks of 1.5kb size. Blocks with less than 150 accessible sites, and with a median distance among consecutive SNPs below 3bp, were discarded. Note: further filters were applied for the population structure and demographic analyses (see Supplementary Table 6).

**Supplementary Table 10. Inference of demographic history.**

| Parameter tag                                                   | Range units | Parameter range |         |              |
|-----------------------------------------------------------------|-------------|-----------------|---------|--------------|
|                                                                 |             | lower           | upper   |              |
| N ancestral                                                     | uniform     | 10000           | 1000000 | *            |
| Time Split On                                                   | uniform     | 200             | 50000   |              |
| Time Split ancestral                                            | uniform     | 1               | 50000   | <sup>a</sup> |
| N North                                                         | uniform     | 1000            | 400000  |              |
| N On                                                            | uniform     | 1000            | 400000  |              |
| N South                                                         | uniform     | 1000            | 400000  |              |
| N ancNorth                                                      | uniform     | 1000            | 400000  |              |
| N ancSouth                                                      | uniform     | 1000            | 400000  |              |
| N BotOn                                                         | uniform     | 10              | 3000    | *            |
| 2Nm On to Off N                                                 | logunif     | 1.00E-06        | 10      | *            |
| 2Nm Off N to On                                                 | logunif     | 1.00E-06        | 10      | *            |
| 2Nm Off S to On                                                 | logunif     | 1.00E-06        | 10      | *            |
| 2Nm On to Off S                                                 | logunif     | 1.00E-06        | 10      | *            |
| 2Nm Off S to Off N                                              | logunif     | 1.00E-06        | 10      | *            |
| 2Nm Off N (or Off S) to<br>ancestral On-Off S (or On-<br>Off N) | logunif     | 1.00E-06        | 10      | *            |

Search range for each parameter (see Supplementary Figure 2 for parameters description). The upper ranges are soft (*i.e.*, if the parameter approaches these values during the optimization, the upper range was increased), except for the parameters indicated with an asterisk (\*). <sup>a</sup>The time of split ancestral is given by adding the range reported to “Time Split On”.



**Supplementary Table 11. Nested ANOVA**

|                                |                              | Source       | DF     | SS     | MS     | F                | P                | PVE  |
|--------------------------------|------------------------------|--------------|--------|--------|--------|------------------|------------------|------|
| <b><u>Environment</u></b>      | <b>Soil brightness</b>       | Habitat      | 1      | 129.66 | 129.66 | 307.40           | <b>&lt;2e-16</b> | 0.48 |
|                                |                              | Habitat:Site | 9      | 30.37  | 3.37   | 8.00             | <b>1.89E-10</b>  | 0.11 |
|                                |                              | Residuals    | 260    | 109.68 | 0.42   |                  |                  | 0.41 |
| <b><u>Color traits</u></b>     | <b>PC1 (dorsal bright.)</b>  | Habitat      | 1      | 87.01  | 87.01  | 218.56           | <b>&lt;2e-16</b> | 0.39 |
|                                |                              | Habitat:Site | 9      | 37.68  | 4.19   | 10.52            | <b>8.07E-14</b>  | 0.17 |
|                                |                              | Residuals    | 254    | 101.12 | 0.40   |                  |                  | 0.45 |
|                                | <b>PC2 (dorsal hue)</b>      | Habitat      | 1      | 17.60  | 17.60  | 18.41            | <b>2.53E-05</b>  | 0.06 |
|                                |                              | Habitat:Site | 9      | 28.86  | 3.21   | 3.35             | <b>0.000671</b>  | 0.10 |
|                                |                              | Residuals    | 254    | 242.83 | 0.96   |                  |                  | 0.84 |
|                                | <b>PC3 (ventral bright.)</b> | Habitat      | 1      | 40.76  | 40.76  | 60.95            | <b>1.53E-13</b>  | 0.15 |
|                                |                              | Habitat:Site | 9      | 62.16  | 6.91   | 10.33            | <b>1.42E-13</b>  | 0.23 |
|                                |                              | Residuals    | 254    | 169.85 | 0.67   |                  |                  | 0.62 |
|                                | <b>PC4 (ventral hue)</b>     | Habitat      | 1      | 0.90   | 0.90   | 1.08             | 0.3              | 0.00 |
|                                |                              | Habitat:Site | 9      | 8.91   | 0.99   | 1.19             | 0.304            | 0.04 |
|                                |                              | Residuals    | 254    | 212.12 | 0.84   |                  |                  | 0.96 |
|                                | <b>D-V boundary</b>          | Habitat      | 1      | 59.32  | 59.32  | 104.62           | <b>&lt;2e-16</b> | 0.25 |
|                                |                              | Habitat:Site | 9      | 33.93  | 3.77   | 6.65             | <b>1.54E-08</b>  | 0.14 |
|                                |                              | Residuals    | 255    | 144.60 | 0.57   |                  |                  | 0.61 |
| <b>Tail stripe</b>             | Habitat                      | 1            | 80.65  | 80.65  | 170.21 | <b>&lt;2e-16</b> | 0.35             |      |
|                                | Habitat:Site                 | 9            | 29.34  | 3.26   | 6.88   | <b>7.54E-09</b>  | 0.13             |      |
|                                | Residuals                    | 251          | 118.94 | 0.47   |        |                  | 0.52             |      |
| <b><u>Non-color traits</u></b> | <b>Total length</b>          | Habitat      | 1      | 0.09   | 0.09   | 0.11             | 0.74             | 0.00 |
|                                |                              | Habitat:Site | 9      | 60.27  | 6.70   | 8.54             | <b>3.89E-11</b>  | 0.24 |
|                                |                              | Residuals    | 250    | 196.08 | 0.78   |                  |                  | 0.76 |
|                                | <b>Tail length</b>           | Habitat      | 1      | 0.14   | 0.14   | 0.18             | 0.672            | 0.00 |
|                                |                              | Habitat:Site | 9      | 49.12  | 5.46   | 7.19             | <b>2.85E-09</b>  | 0.21 |
|                                |                              | Residuals    | 250    | 189.91 | 0.76   |                  |                  | 0.79 |
|                                | <b>Hind foot length</b>      | Habitat      | 1      | 2.10   | 2.10   | 3.01             | 0.084            | 0.01 |
|                                |                              | Habitat:Site | 9      | 105.40 | 11.71  | 16.81            | <b>&lt;2e-16</b> | 0.38 |
|                                |                              | Residuals    | 248    | 172.70 | 0.70   |                  |                  | 0.62 |
|                                | <b>Ear length</b>            | Habitat      | 1      | 0.35   | 0.35   | 0.48             | 0.491            | 0.00 |
|                                |                              | Habitat:Site | 9      | 44.39  | 4.93   | 6.70             | <b>1.38E-08</b>  | 0.20 |
|                                |                              | Residuals    | 247    | 181.78 | 0.74   |                  |                  | 0.80 |

Nested ANOVA tables for environmental, color trait, and non-color trait measurements, with degrees of freedom (DF), sum of squares (SS), mean sum of squares (MS), *F*-statistic (F), *P*-value (P), and proportion variance explained (PVE). “Habitat” refers to whether samples were collected on or off the Sand Hills; “Habitat:Site” refers to collecting locations nested within habitat type. Significant *P*-values ( $\alpha = 0.05$ ) are bolded.

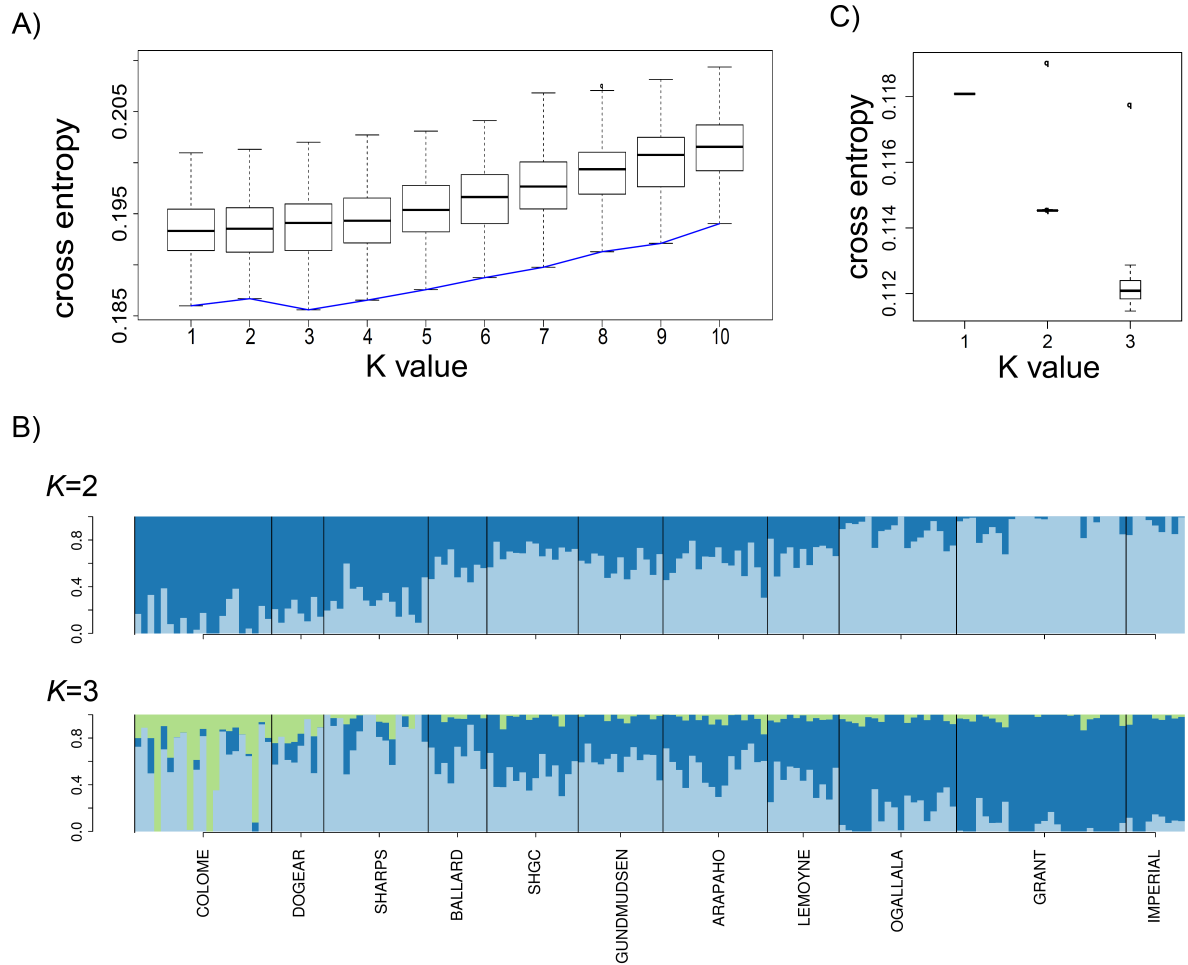

**Supplementary Figure 1. Population structure analyses with sNMF and TESS3.** A) Cross-entropy for each  $K$ -value. Boxplots correspond to the distribution of cross-entropy values obtained by performing 100 runs for each  $K$  value. Blue line represents the minimum cross-entropy for each  $K$  value. The distribution of cross-entropy is similar for values  $K=1-4$ , but the lowest  $K$  value (corresponding to the minimal cross-entropy) is  $K=3$ . B) Estimated ancestry proportions for each individual for  $K=2$  and  $K=3$  with sNMF, without accounting for geographic location of individuals. C) Cross-entropy for  $K$  values from 1 to 3 using the method accounting for geographic information implemented in TESS3. Boxplots correspond to the distribution of cross-entropy values obtained by performing 1000 runs for each  $K$  value. The blue line represents the minimum cross-entropy for each  $K$  value. When accounting for the geographic sampling location of individuals, the cross-entropy decreases for  $K$  from 1 to 3, with a minimum value at 3. Results reported with lambda value of 0.01, but similar results were obtained when changing the lambda values from 0.01 to 0.05 (values nearer to zero give less weight to the geographic location of individuals).

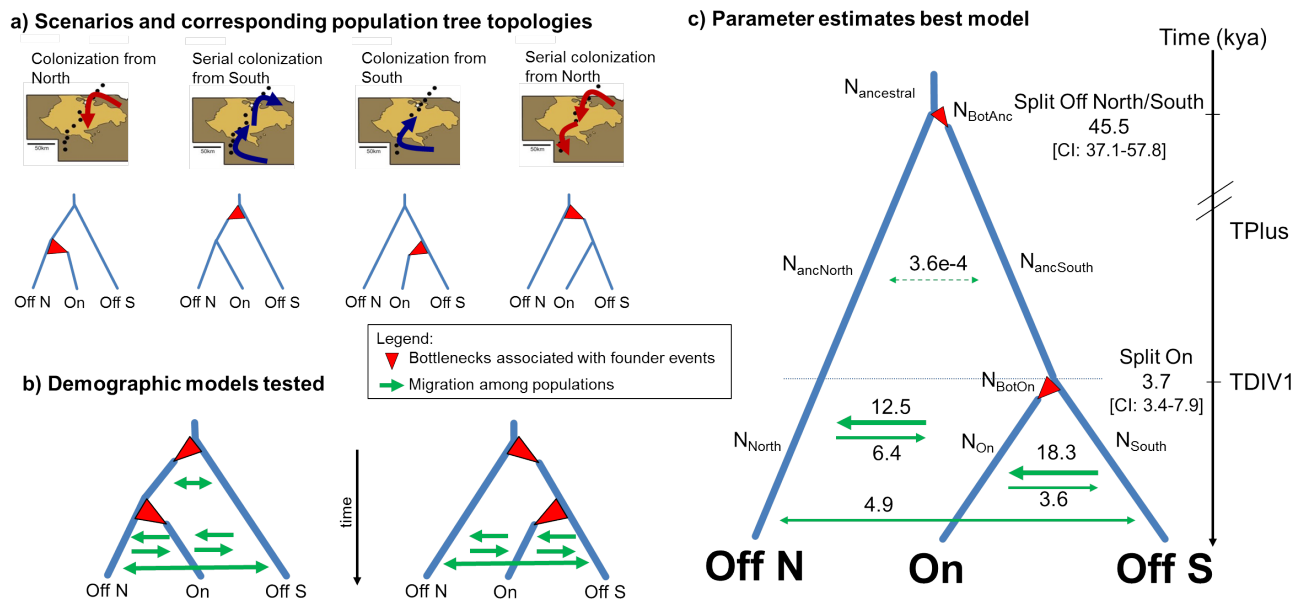

**Supplementary Figure 2. Demographic modeling favors colonization from the south.** (a) Four scenarios were tested and the corresponding three-population model tree topologies are provided. The three samples correspond to populations north of the Sand Hills (Off N), on the Sand Hills (On), and south of the Sand Hills (Off S). Although alternative scenarios might have identical population trees, they can be distinguished as founder events associated with the colonization of the Sand Hills are expected to occur on different lineages. (b) Demographic models tested with two topologies, allowing for up to two bottlenecks associated with the population split, and gene flow among populations. Under this modeling framework, we can distinguish among scenarios with the same tree topology by inferring the strength of the bottlenecks associated with the split of the Sand Hills populations (indicated as red arrows), representing potential founder events related with the colonization of the Sand Hills. For instance, for the tree topology ((Off N, On), Off S), if inferred parameters indicate a stronger bottleneck associated with the Sand Hills (“On”), it would support a colonization from the north scenario, whereas a stronger bottleneck associated with the split of the ancestor of “Off N” and “On” would suggest a serial colonization from the south. (c) Parameter estimates under the best model, supporting a southern colonization route. Parameter estimates for scaled immigration rates  $2Nm$  (i.e., average number of immigrants per generation) are shown above or below corresponding arrows, and the time of events (given in thousand years (kya)) is indicated at the nodes, assuming 2.5 generations per year and a mutation rate of  $3.67 \times 10^{-8}$  per site per generation. Parameter tags are indicated next to each corresponding parameter. Demographic modeling was based on the three-dimensional minor allele frequency spectrum (3D MSFS), considering models with three populations. The 3D folded SFS was generated by dividing the data set into blocks of 1.5kb, sampling ten individuals for each block from each population without missing data - resulting in a 3D folded SFS with 140,358 SNPs.

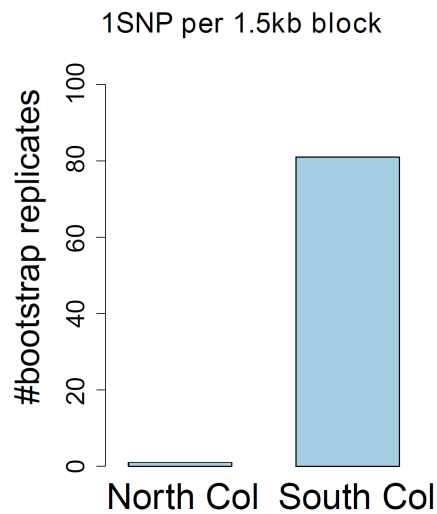

**Supplementary Figure 3. Model support based on Akaike's information criterion (AIC) across bootstrap replicates.** Only SNPs further than 1.5kb apart were considered, and hence each bootstrap replicate was obtained by sampling one SNP per 1.5kb block. Likelihoods were computed for each bootstrap replicate based on the expected site frequency spectrum for each model (approximated with  $10 \times 10^6$  coalescent simulations) using the parameter estimates that maximized the likelihood with a larger data set (140,358 SNPs), potentially including linked sites. The y-axis represents the number of bootstrap replicates supporting a given model. Each bootstrap replicate was assigned to the model with a relative likelihood (based on the AIC) larger than 0.95. On the y-axis, a value of 100 indicates that a given model was supported by all bootstrap replicates. Note: 14 bootstrap replicates could not be assigned to any model as the relative likelihood was below 0.95 for both models.

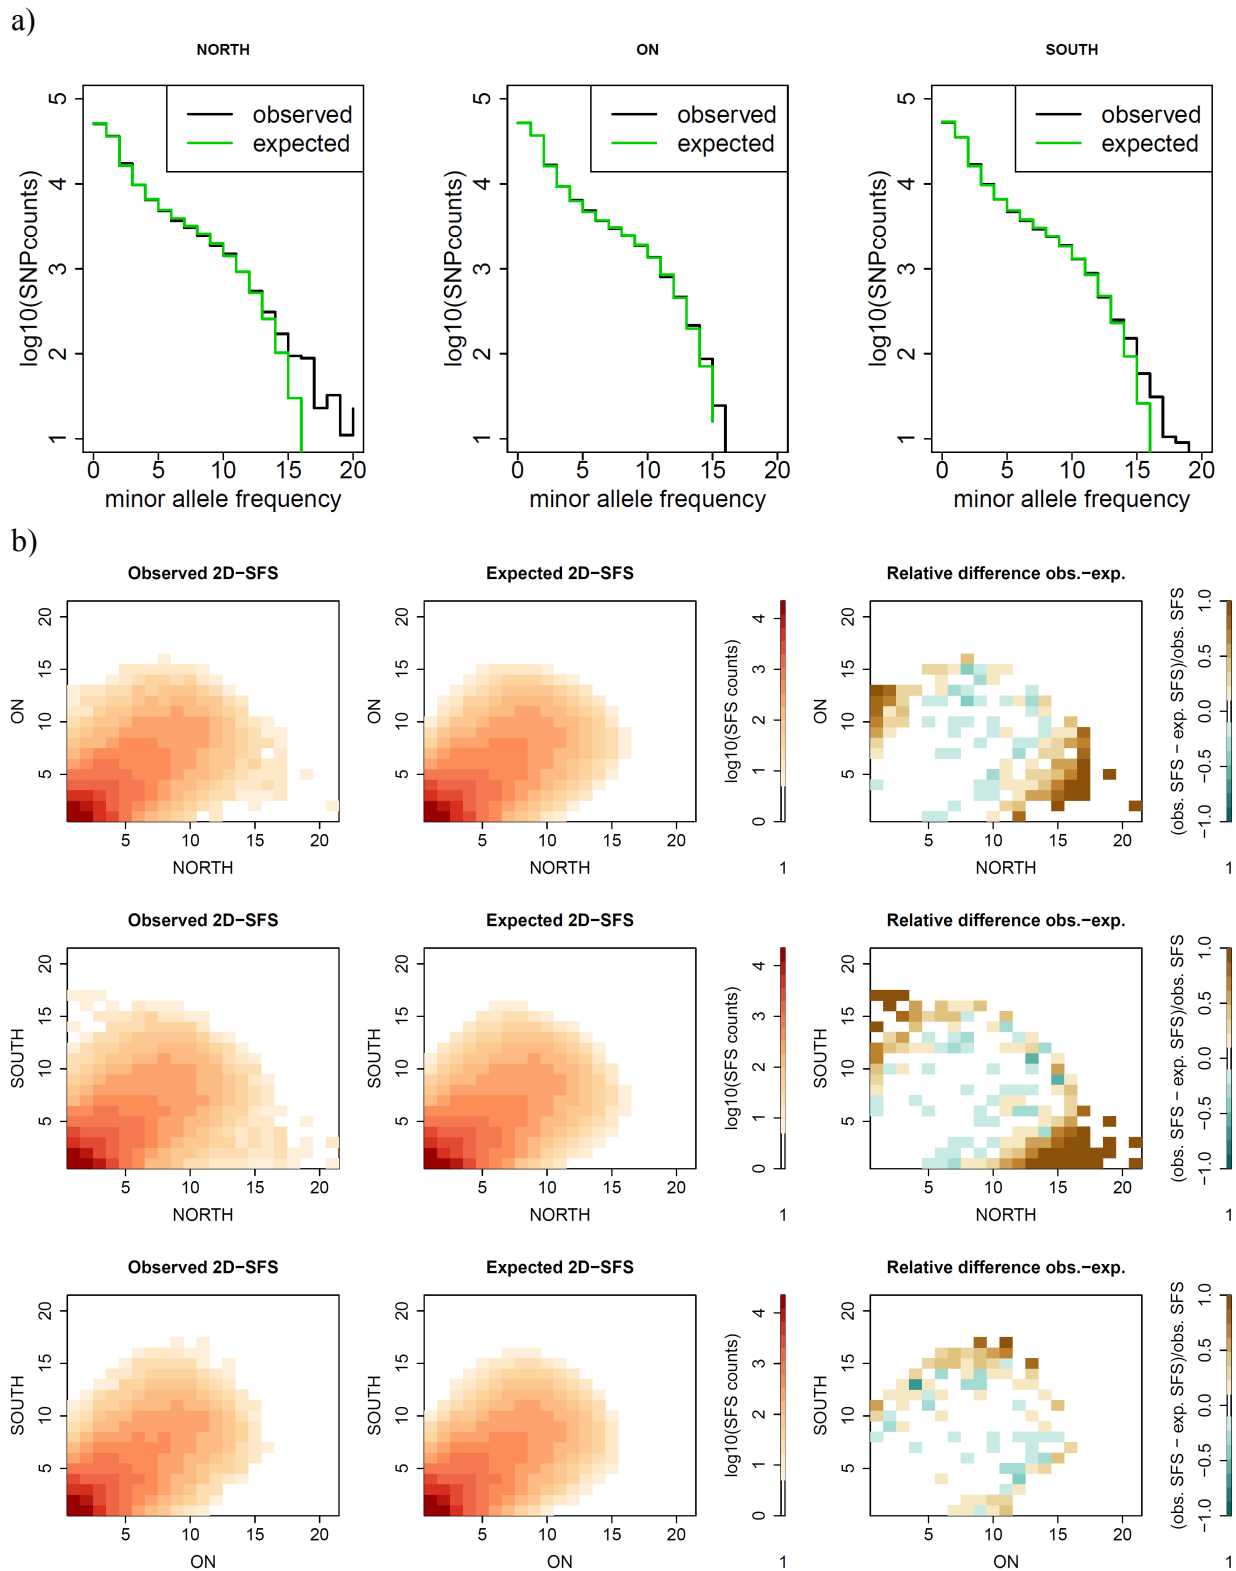

**Supplementary Figure 4: Observed marginal site frequency spectrum (SFS).** (a) 1D and (b) 2D SFS and fit of the marginal minor allele frequency (MAF) spectrum for the best model. The south colonization model fits the MAF spectrum for each sample well. In panel b, the x-and y-axis represent the MAF. As can be seen by the marginal 2D observed SFS, the sample “On” the Sand Hills has more SNPs along the diagonal with the sample south “Off” the Sand Hills, suggesting it is more closely related to the southern population.

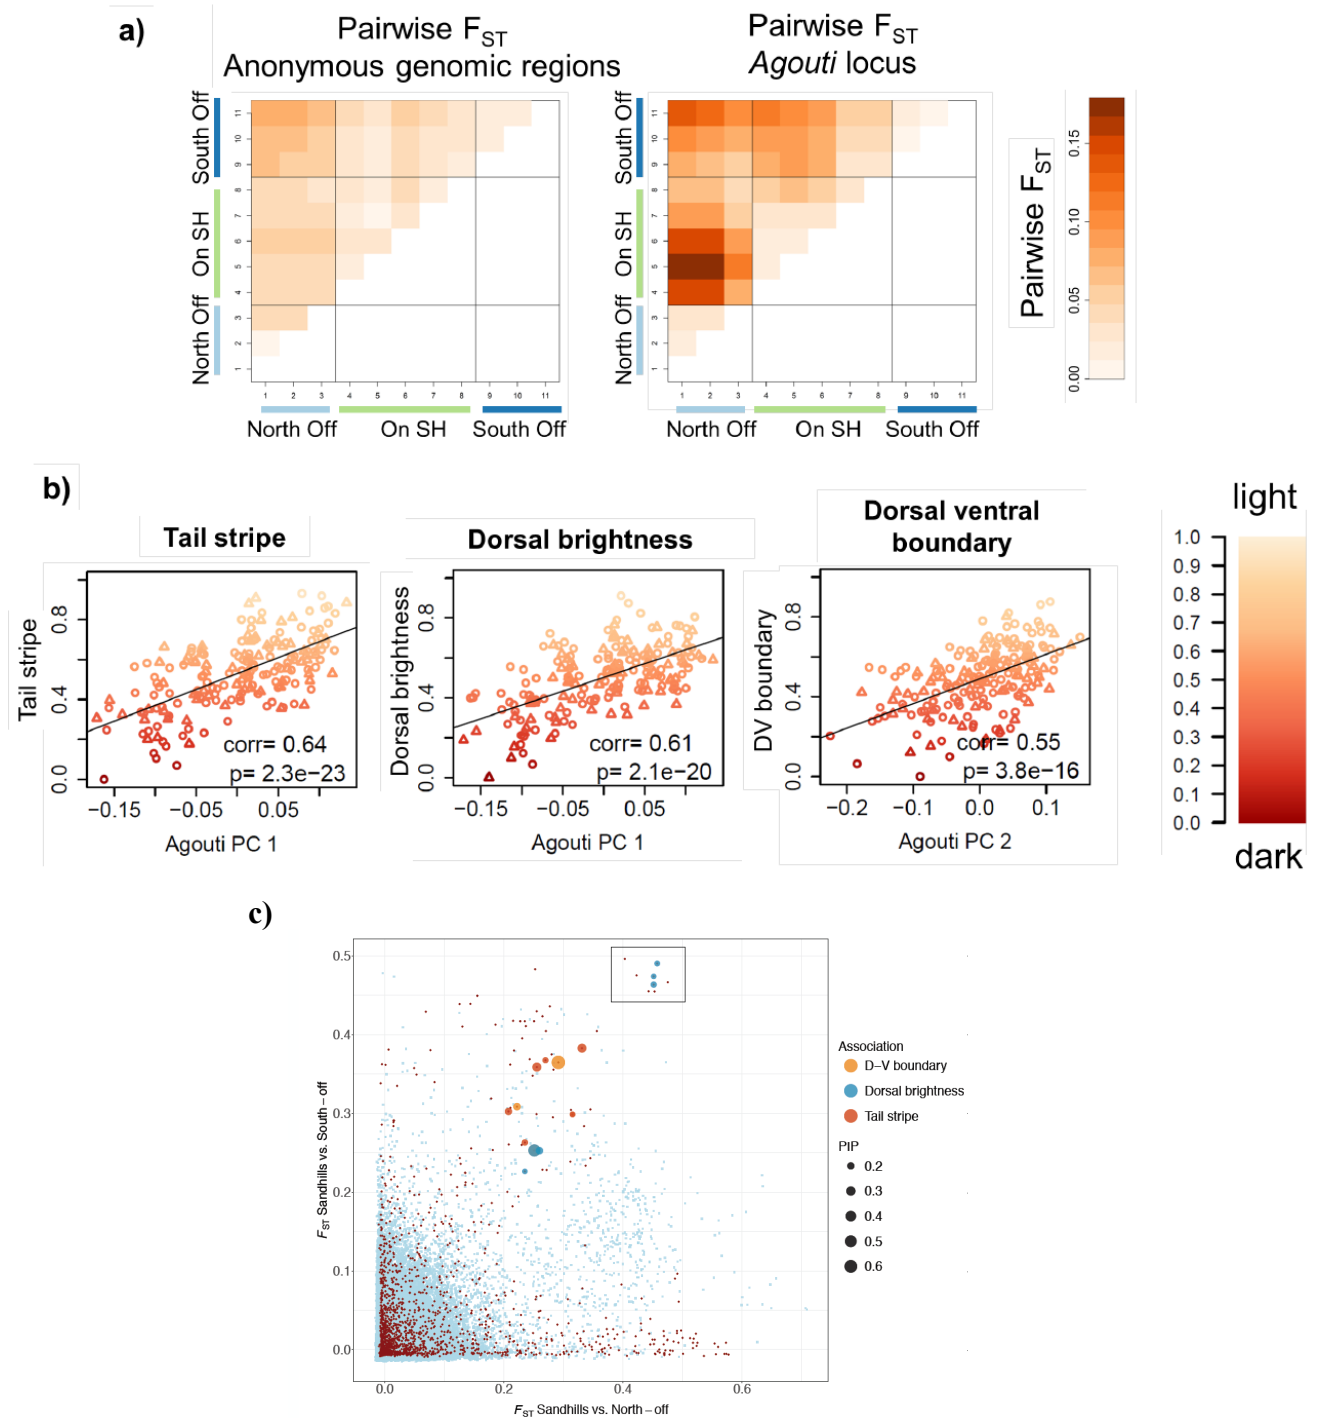

**Supplementary Figure 5. Comparison of genetic differentiation for random background genomic regions and *Agouti*.** (a)  $F_{ST}$  for samples along the transect. At the *Agouti* locus, higher  $F_{ST}$  values are observed, particularly for comparisons between samples On (green) and Off (blue) of the Sand Hills. (b) Genetic differentiation at *Agouti* is correlated with phenotypic trait values. PC1 correlates with tail stripe and dorsal brightness, whereas PC2 correlates with the dorsal ventral boundary, in agreement with Linnen *et al.* 2013 (color-coded with darker phenotypes in darker shades). Circles represent males, and triangles females. (c) The x-axis gives  $F_{ST}$  values for On vs. North, and the y-axis gives values for On vs. South, for *Agouti* (red) and background regions (blue). Points highlighted by a square correspond to the highest peak of differentiation. For SNPs with  $F_{ST}$  values above 0.2, their estimated contribution to the phenotypes considered in the association study are indicated by dot size (PIP > 0.15).

a)

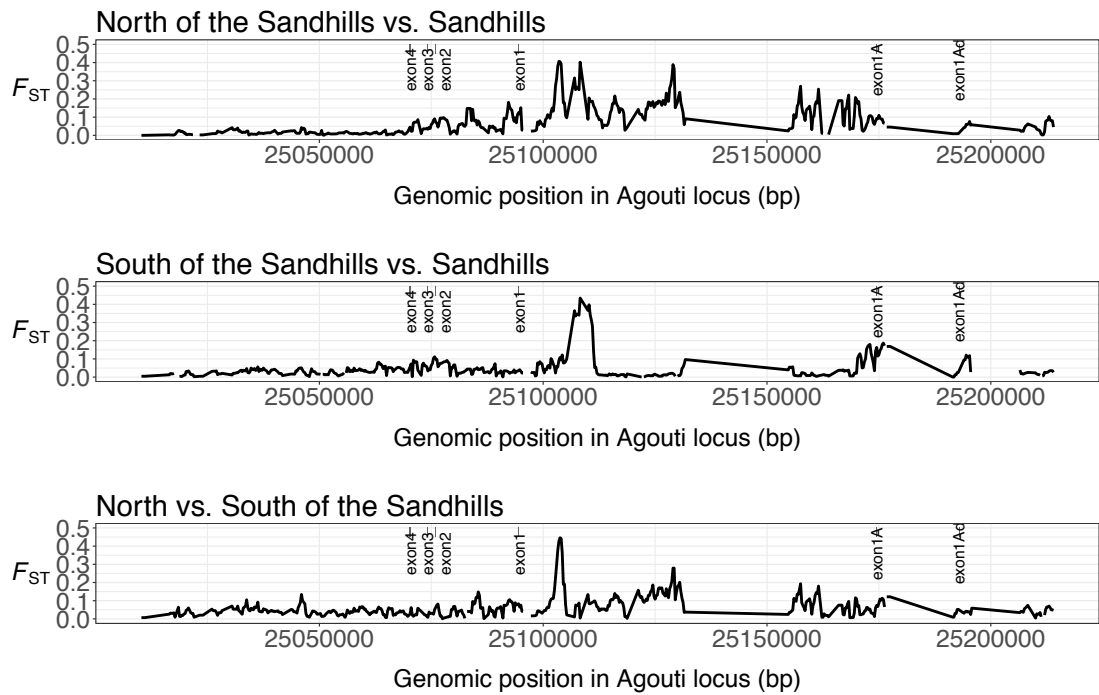

b)

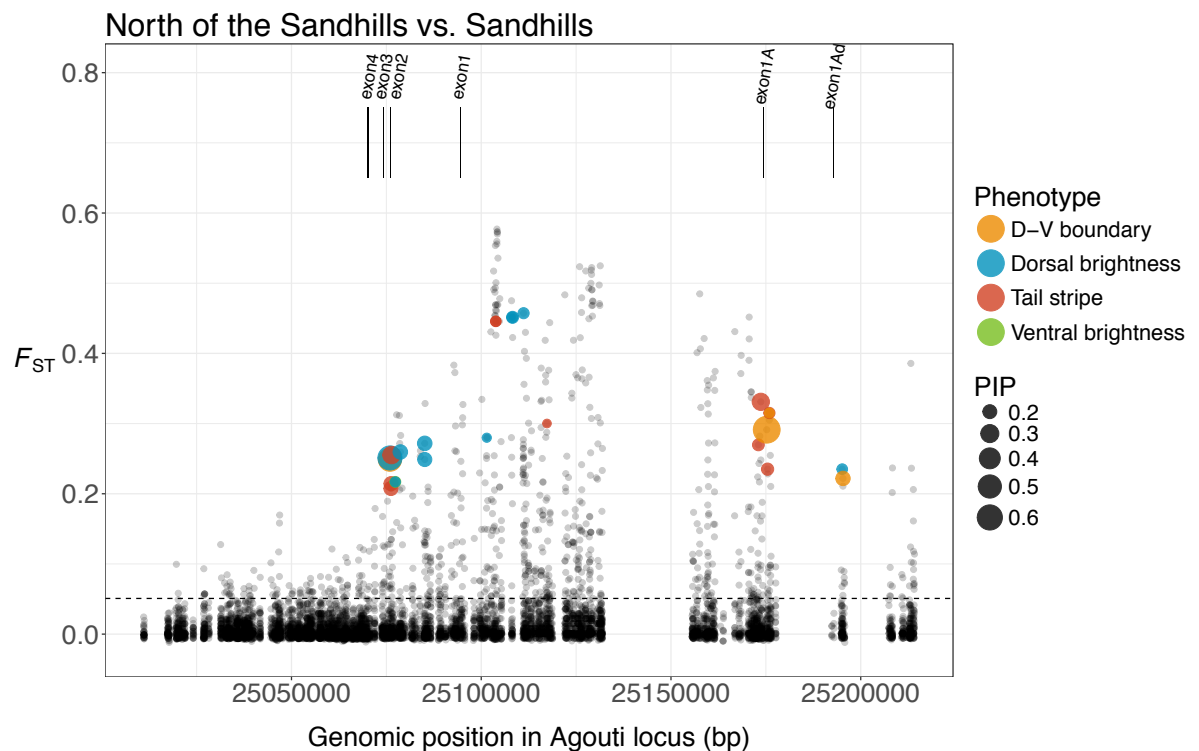

**Supplementary Figure 6. Genetic differentiation ( $F_{ST}$ ) between populations On and Off of the Sand Hills at *Agouti*.** Values are calculated (a) in sliding windows (window size: 1kb, step size: 100bp) and (b) per SNP using VCFtools v.0.1.12b. Vertical lines correspond to the locations of known exons in the *Agouti* locus.

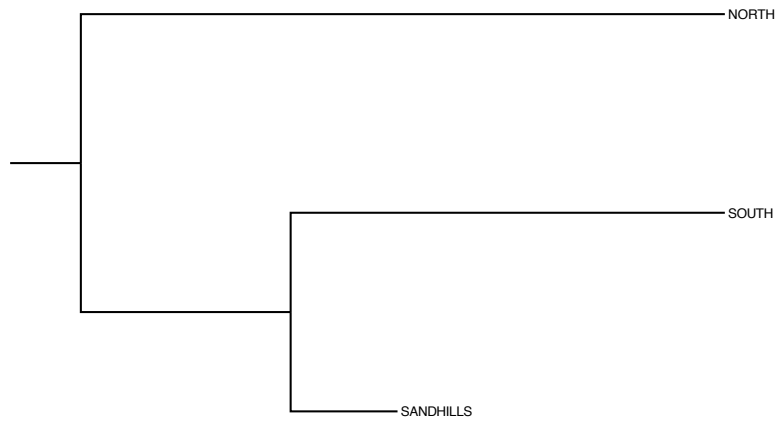

**Supplementary Figure 7. Graphical representation of the kinship matrix.** This tree is output produced by HapFLK, using all background genomic regions (excluding *Agouti*). Note shorter branch lengths represent more similar allele frequencies among populations.



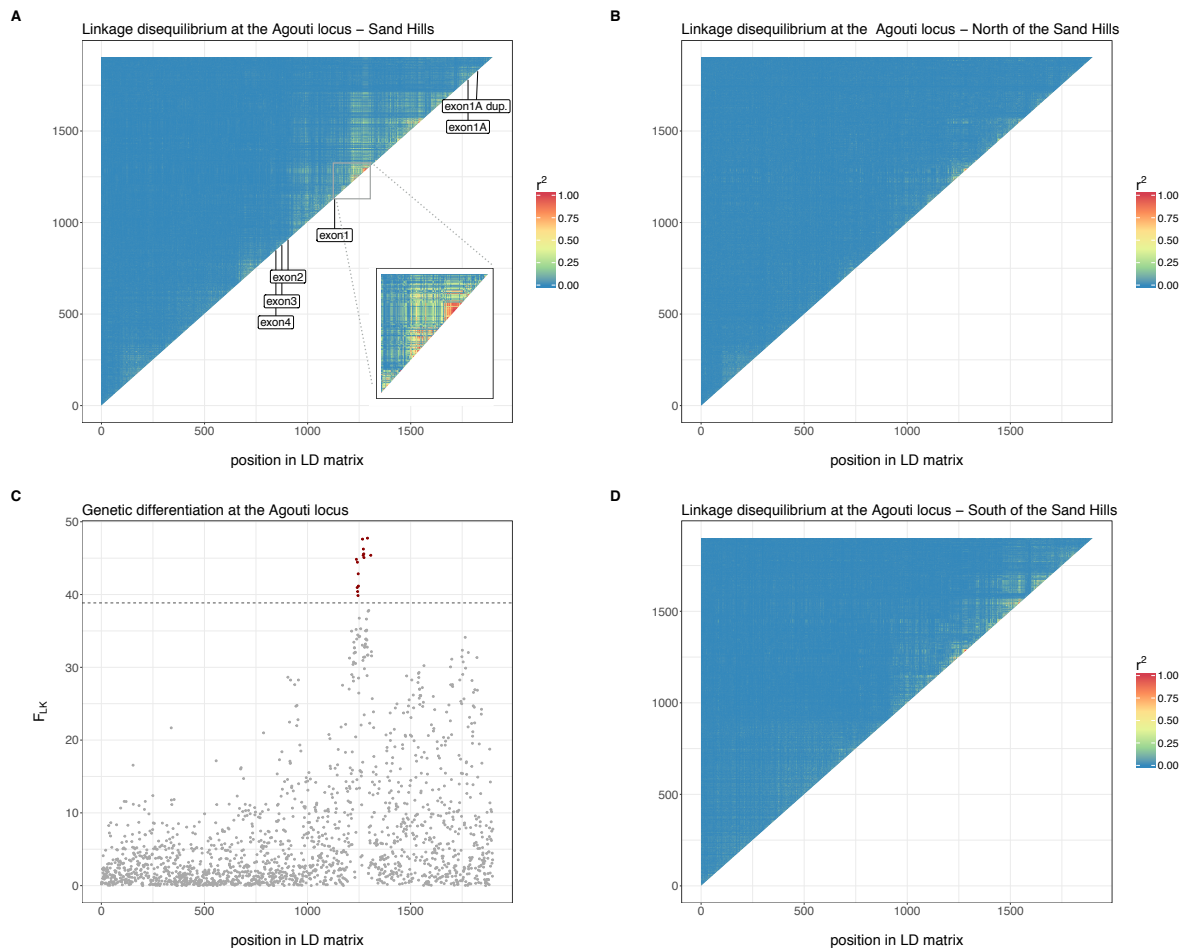

**Supplementary Figure 8. Patterns of linkage disequilibrium (LD) across the *Agouti* locus.**  $r^2$  values have been calculated with vcftools (--hap-r2) excluding all variants with a minor allele frequency strictly lower than 5%. The x-axis of the 4 panels are aligned. A) LD patterns in mice sampled at the Sand Hills. The inset highlights the fine-grained LD patterns around the significant peak of genetic differentiation (panel C). Approximate positions of all exons are indicated. B) LD patterns in mice sampled North of the Sand Hills. C) The FLK statistic represents variant-specific allelic differentiation across the 3 main geographic localities. The same filtering as in the LD analysis has been applied such that x-axes could be aligned. D) LD patterns in mice sampled South of the Sand Hills. For panels C and D, only variants present in the Sand Hills were used so that all three heat maps are constructed with an identical set of variants.

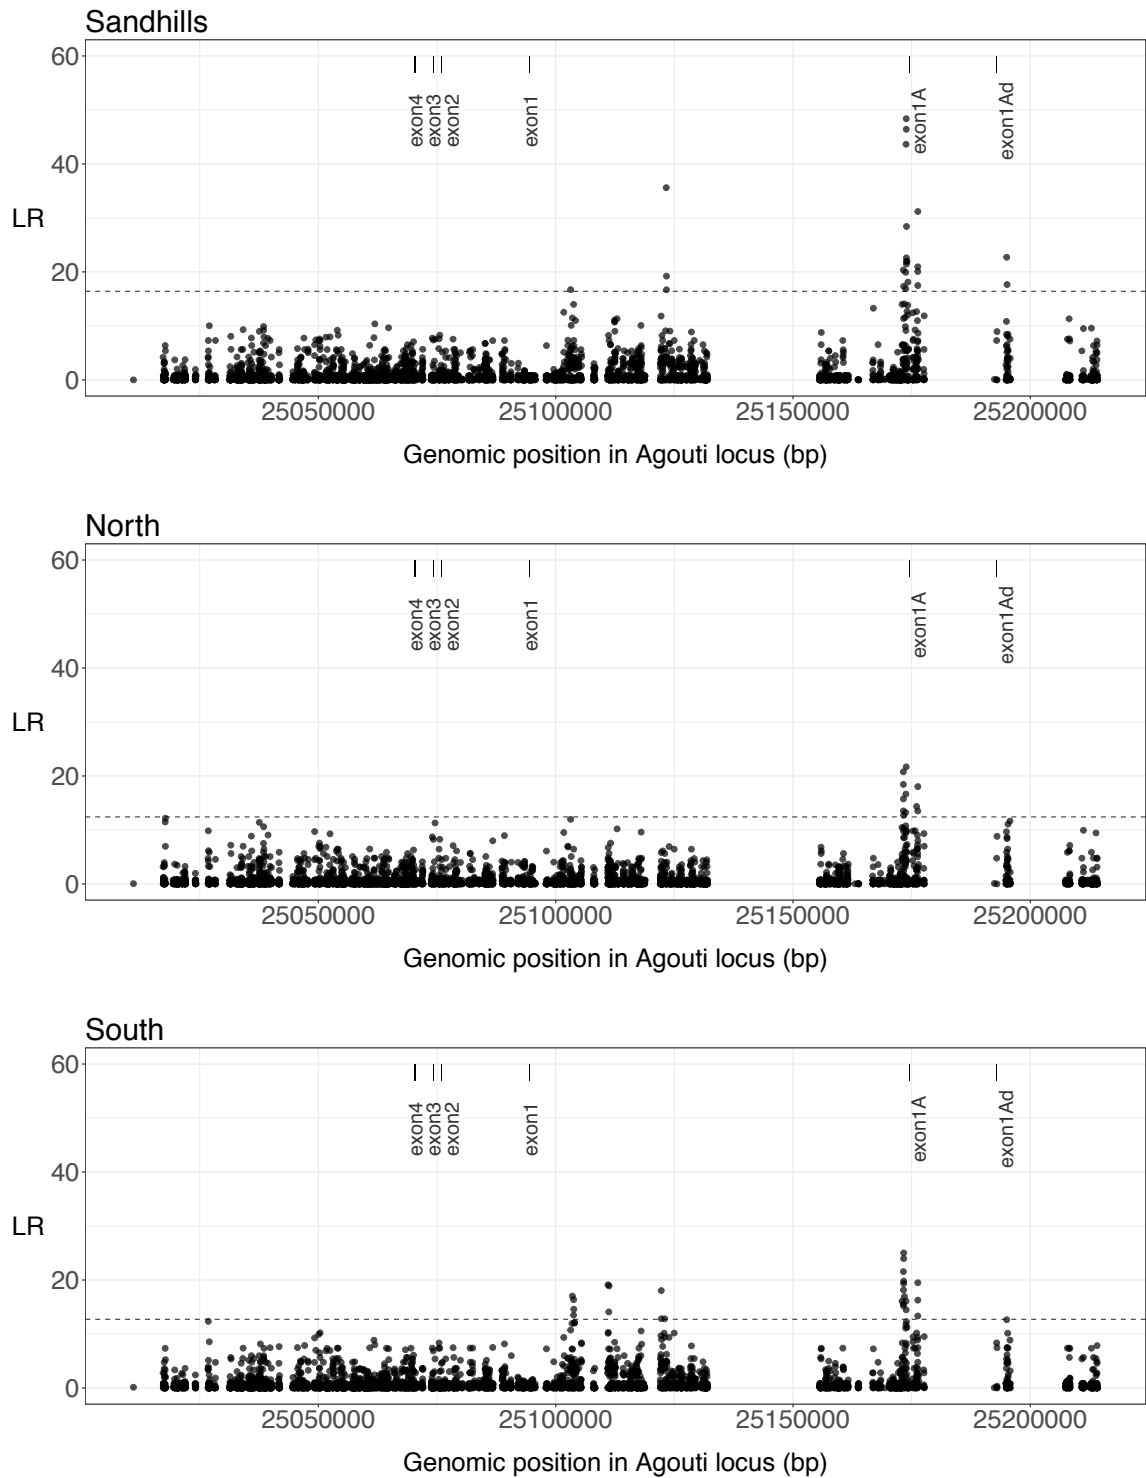

**Supplementary Figure 9. The composite likelihood ratio (CLR) test across the *Agouti* locus.** The CLR test identifies SNPs that deviate from neutral expectations. The CLR statistic was obtained using a pre-computed SFS obtained from the background dataset for the (a) Sand Hills, (b) North of the Sand Hills and (c) South of the Sand Hills populations. Dotted horizontal lines correspond to a theoretical significance threshold calculated for the Sand Hills region using neutral simulations.

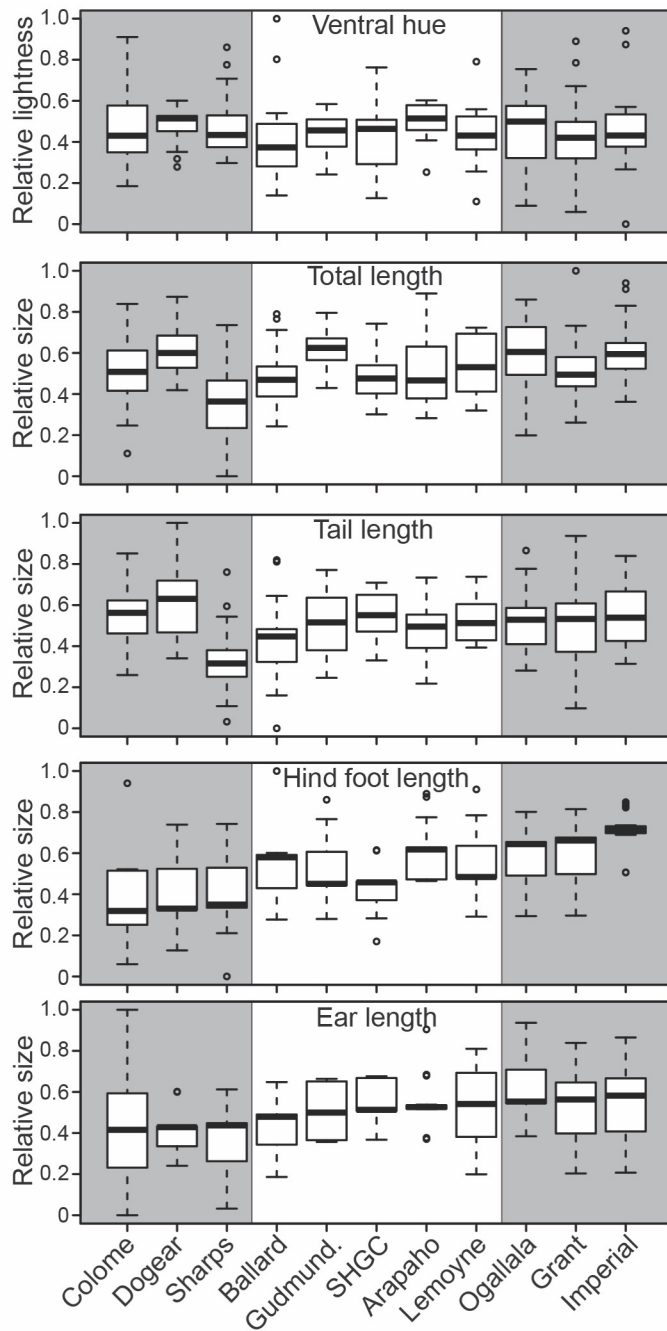

**Supplementary Figure 10. Ventral hue and non-color traits are not significantly different on and off the Sand Hills.** Box plots for each sampling site were produced using scaled (range: 0-1), normal-quantile transformed values for: ventral hue (PC4), total body length, tail length, hind foot length, and ear length. In all plots, higher values correspond to lighter/brighter color or longer lengths. Grey shading indicates non-Sand Hills sites. Ventral hue did not differ significantly between habitats (on vs. off Sand Hills) or among sites ( $P > 0.05$ ). All four length traits differed significantly among sites nested within habitats, but not among habitats.
